# Supplementary material for: Characterization and Genomic Analysis of Fererhizobium litorale gen. nov., sp. nov., Isolated from the Sandy Sediments of the Sea of Japan Seashore
Source: MDPI journal article supplement (doi:10.3390/microorganisms11102385), 2023-09-25
Supplement: s1 [file s1]

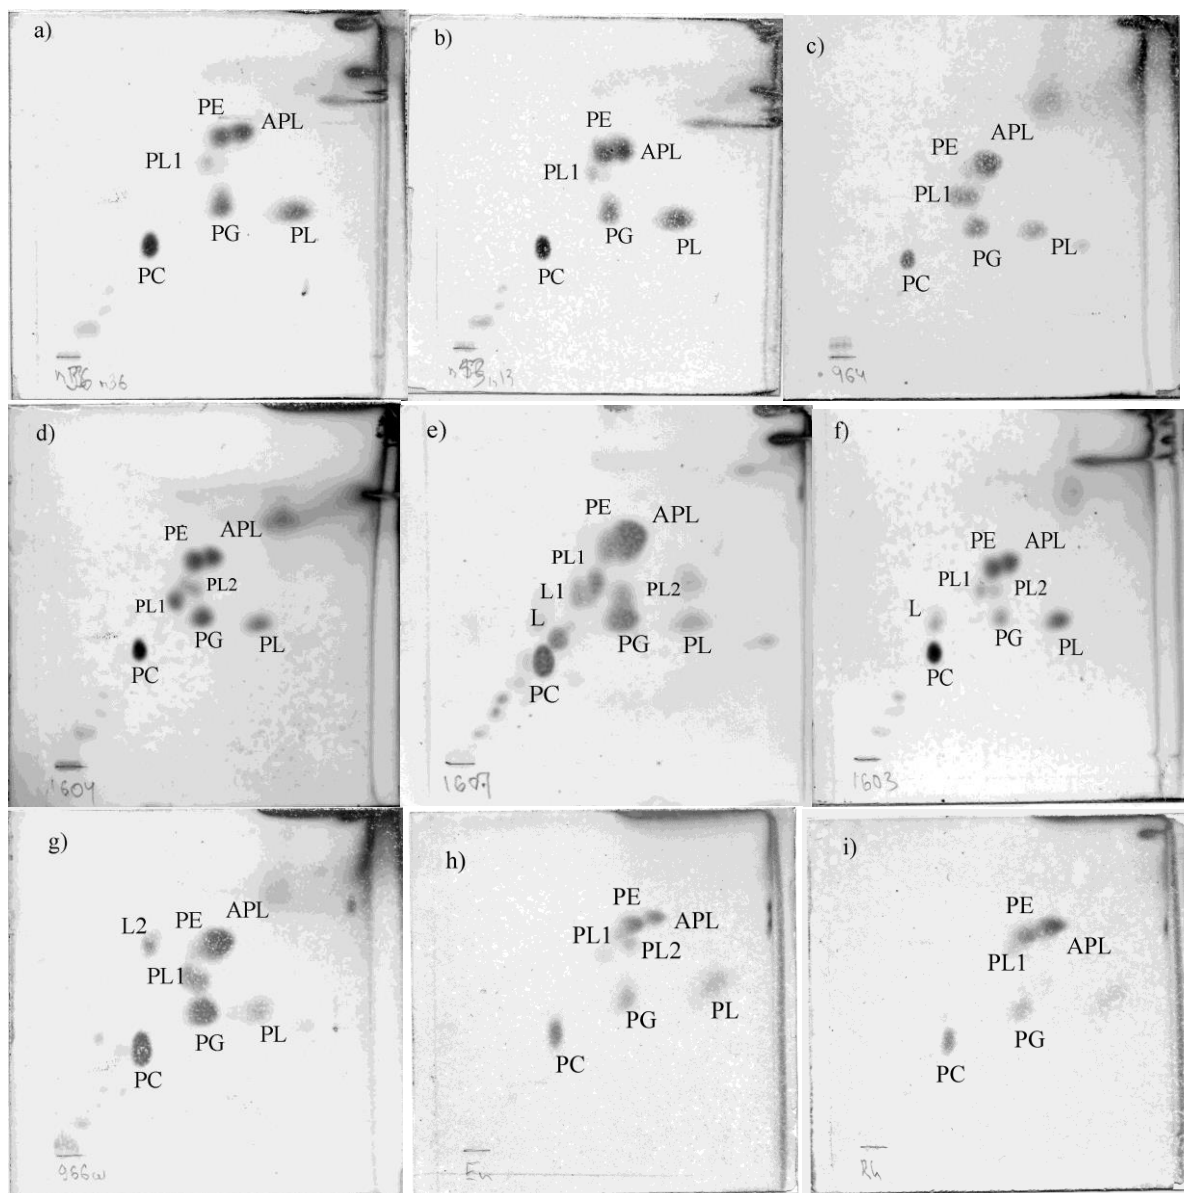

**Figure S1.** Two-dimensional thin-layer chromatograms of polar lipids of strains: (a) KMM 9576<sup>T</sup>; (b) KMM 9553; (c) *Rhizobium leguminosarum* NBRC 14778<sup>T</sup>; (d) *Agrobacterium radiobacter* NBRC 13532<sup>T</sup>; (e) *Rhizobium rhizogenes* NBRC 13257<sup>T</sup>; (f) *Sinorhizobium garmanticum* LMG 24692<sup>T</sup>; (g) *Mesorhizobium mediterraneum* JCM 21565<sup>T</sup>; (h) *Ensifer adhaerens* NBRC 100388<sup>T</sup>; (i) *Pararhizobium giardinii* NBRC 107135<sup>T</sup>. Abbreviations: PC, phosphatidylcholine, PE, phosphatidylethanoamine; PG, phosphatidylglycerol; APL, an unknown aminophospholipid; PL, PL1, PL2, unknown phospholipids; L, L1, L2, unknown lipids.

**Table S1.** Average nucleotide identity (ANI), average amino acid identity (AAI), and digital DNA-DNA hybridization (dDDH) values for studied strains KMM 9576<sup>T</sup> and KMM 9553 and selected taxa from the family *Rhizobiaceae*.

| <b>Genome 1</b>         | <b>Genome 2</b>                                        | <b>ANI, %</b> | <b>AAI, %</b> | <b>dDDH, %</b> |
|-------------------------|--------------------------------------------------------|---------------|---------------|----------------|
| KMM 9576 <sup>T</sup>   | KMM 9553                                               | 99.95         | 99.69         | 99.6           |
| KMM 9576 <sup>T</sup> / | <i>Rhizobium leguminosarum</i> USDA                    | 79.23/        | 69.56/        | 20.7/ 20.7     |
| KMM 9553                | 2370 <sup>T</sup>                                      | 79.18         | 69.38         |                |
| KMM 9576 <sup>T</sup> / | <i>Neorhizobium galegae</i> HAMBI 540 <sup>T</sup>     | 78.85/        | 67.78/        | 20.8/ 20.8     |
| KMM 9553                |                                                        | 78.81         | 67.72         |                |
| KMM 9576 <sup>T</sup> / | <i>Endobacterium cereale</i> RZME27 <sup>T</sup>       | 78.35/        | 66.79/        | 20.1/ 20.1     |
| KMM 9553                |                                                        | 78.11         | 66.66         |                |
| KMM 9576 <sup>T</sup> / | <i>Pseudorhizobium pelagicum</i> R1-200B4 <sup>T</sup> | 79.06/        | 68.97/        | 20.3/ 20.3     |
| KMM 9553                |                                                        | 79.02         | 68.74         |                |
| KMM 9576 <sup>T</sup> / | <i>Agrobacterium radiobacter</i> CCUG                  | 78.59/        | 68.07/        | 20.4/ 20.4     |
| KMM 9553                | 3354                                                   | 78.60         | 67.87         |                |
| KMM 9576 <sup>T</sup> / | <i>Peteryoungia ipomoeae</i> shin9-1 <sup>T</sup>      | 79.14/        | 68.23/        | 20.3/ 20.4     |
| KMM 9553                |                                                        | 79.10         | 68.06         |                |
| KMM 9576 <sup>T</sup> / | <i>Ciceribacter lividus</i> DSM 25528 <sup>T</sup>     | 79.26/        | 69.84/        | 20.4/ 20.4     |
| KMM 9553                |                                                        | 79.23         | 69.66         |                |
| KMM 9576 <sup>T</sup> / | <i>Gellertiella hungarica</i> DSM 29853 <sup>T</sup>   | 79.43/        | 67.10/        | 20.4/ 20.4     |
| KMM 9553                |                                                        | 79.32         | 66.79         |                |
| KMM 9576 <sup>T</sup> / | <i>Ensifer adhaerens</i> Casida A <sup>T</sup>         | 79.87/        | 69.18/        | 21.6/ 21.6     |
| KMM 9553                |                                                        | 79.90         | 69.06         |                |
| KMM 9576 <sup>T</sup> / | <i>Sinorhizobium fredii</i> USDA 205 <sup>T</sup>      | 79.59/        | 68.75/        | 21.0/ 21.0     |
| KMM 9553                |                                                        | 79.49         | 68.60         |                |
| KMM 9576 <sup>T</sup> / | <i>Pararhizobium giardinii</i> H152 <sup>T</sup>       | 79.36/        | 69.10/        | 20.8/ 20.8     |
| KMM 9553                |                                                        | 79.28         | 69.09         |                |
| KMM 9576 <sup>T</sup> / | <i>Shinella granuli</i> DSM 18401 <sup>T</sup>         | 79.66/        | 69.09/        | 21.1/ 21.1     |
| KMM 9553                |                                                        | 79.70         | 68.90         |                |

**Table S3.** Differential physiological characteristics of strains KMM 9576<sup>T</sup> and KMM 9553 and the most closely related bacteria. Strains: **1**, KMM 9576<sup>T</sup>; **2**, KMM 9553; **3**, *Rhizobium leguminosarum* NBRC 14778<sup>T</sup>; **4**, *Ensifer adhaerens* NBRC 100388<sup>T</sup>; **5**, *Sinorhizobium garamanticum* LMG 24692<sup>T</sup>; **6**, *Pararhizobium giardinii* NBRC 107135<sup>T</sup> (data were obtained from the present study). All strains were positive for utilization of esculin ferric citrate and negative for utilization of glycerol, erythritol, dulcitol, inositol, D-mannitol, methyl- $\alpha$ D-mannopyranoside, methyl- $\alpha$ D-glucopyranoside, N-acetylglucosamine, amygdalin, salicin, D-lactose, inulin, amidon, glycogen, xylitol, D-turanose D-lyxose, D-tagatose, potassium gluconate, potassium 2-ketogluconate, potassium 5-ketogluconate.

| Utilization of:                  | 1   | 2   | 3   | 4   | 5 | 6 |
|----------------------------------|-----|-----|-----|-----|---|---|
| D-arabinose                      | (+) | +   | -   | +   | + | - |
| L-arabinose                      | -   | +   | -   | +   | + | - |
| D-ribose                         | (+) | +   | -   | -   | - | - |
| D-xylose                         | -   | (+) | -   | -   | - | - |
| L-xylose                         | (+) | -   | +   | -   | - | - |
| D-adonitol                       | -   | -   | -   | +   | + | - |
| Methyl- $\beta$ D-xylopyranoside | -   | -   | -   | +   | - | - |
| D-galactose                      | -   | -   | -   | +   | + | - |
| D-glucose                        | -   | -   | -   | +   | + | - |
| D-fructose                       | -   | -   | -   | +   | + | - |
| D-mannose                        | -   | -   | -   | +   | + | - |
| L-sorbose                        | -   | -   | -   | (+) | - | - |
| L-rhamnose                       | (+) | +   | (+) | +   | + | - |
| D-sorbitol                       | -   | +   | -   | -   | - | - |
| Arbutin                          | -   | -   | -   | (+) | + | - |
| D-cellobiose                     | -   | (+) | -   | -   | + | - |
| D-maltose                        | -   | (+) | -   | -   | + | - |
| D-melibiose                      | -   | (+) | -   | +   | + | - |
| D-saccharose                     | -   | (+) | -   | +   | + | - |
| D-tregalose                      | -   | (+) | -   | -   | - | - |
| D-melezitose                     | -   | -   | -   | +   | + | - |
| D-raffinose                      | -   | -   | -   | (+) | + | - |
| Gentiobiose                      | -   | (+) | -   | +   | - | - |

|            |   |     |   |   |   |   |
|------------|---|-----|---|---|---|---|
| D-fucose   | + | +   | + | + | - | - |
| L-fucose   | + | -   | - | + | - | - |
| D-arabitol | - | (+) | - | + | - | - |
| L-arabitol | - | -   | - | + | - | - |
